# Supplementary material for: Salinity and pH effects on water–oil–calcite interfaces by using molecular dynamics
Source: Royal Society of Chemistry journal article supplement (doi:10.1039/d3cp05301f), 2024-01-01
Supplement: d3cp05301f1.pdf [file d3cp05301f1.pdf]

Supporting information of  
Salinity and pH effect on water-oil-calcite interfaces by molecular dynamics

**Authors**

Anderson Arboleda-Lamus<sup>a</sup>, Leonardo Muñoz-Rugeles<sup>a</sup>, Jorge M. del Campo<sup>b</sup>, Nicolas Santos-Santos<sup>c</sup>, Julio Pérez<sup>c</sup> and Enrique Mejía-Ospino<sup>a,c</sup>

a Laboratorio de Espectroscopía Atómica y Molecular (LEAM), Universidad Industrial de Santander, Bucaramanga, Colombia

E-mail: [emejia@uis.edu.co](mailto:emejia@uis.edu.co)

b Departamento de Física y Química Teórica, Facultad de Química, Universidad Nacional Autónoma de México, México

c Grupo de Investigación en Tomografía Computarizada para Caracterización de Yacimientos (GIT), Universidad Industrial de Santander, Bucaramanga, Colombia

Table S1. Individual parameters.

|                | Phase                                                                               | Atom type     | Charge (e) | A12 (kcal/mol) | B6 (kcal/mol) |
|----------------|-------------------------------------------------------------------------------------|---------------|------------|----------------|---------------|
| Carbonate      |                                                                                     | C_calcite     | -0.999     | 3441682.6004   | 1101.8164     |
|                |                                                                                     | Ca_calcite    | +1.668     | 60229.4455     | 339.3881      |
|                |                                                                                     | O_calcite     | -0.889     | 423040.1530    | 485.1816      |
| Salts          |                                                                                     | Na_ion        | +1         | 20648.4015     | 15.1310       |
|                |                                                                                     | Ca_ion        | +2         | 69748.1484     | 354.1901      |
|                |                                                                                     | Mg_ion        | +2         | 1368.9918      | 69.2222       |
|                |                                                                                     | Cl_ion        | -1         | 26000401.2760  | 3500.0486     |
|                |                                                                                     | O_sulfate_ion | -1.1       | 954391.6818    | 976.9297      |
|                |                                                                                     | S_sulfate_ion | +2.4       | 4006270.2004   | 2001.5669     |
|                |                                                                                     |               |            |                |               |
| Water          |                                                                                     | H_water       | +0.417     | 0.0000         | 0.0000        |
|                |                                                                                     | O_water       | -0.834     | 582202.1981    | 595.1570      |
| Heptane        | 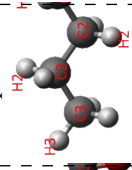   | C2            | -0.12      | 892114.2141    | 485.3021      |
|                |                                                                                     | C3            | -0.18      | 892114.2141    | 485.3021      |
|                |                                                                                     | H2            | +0.06      | 7152.5574      | 29.2969       |
|                |                                                                                     | H3            | +0.06      | 7152.5574      | 29.2969       |
| Heptanoate     |   | C11           | +0.7       | 3248063.4400   | 1167.9840     |
|                |                                                                                     | C21           | -0.12      | 892114.2141    | 485.3021      |
|                |                                                                                     | C22           | -0.12      | 892114.2141    | 485.3021      |
|                |                                                                                     | C31           | -0.18      | 811012.9219    | 441.1838      |
|                |                                                                                     | H21           | +0.06      | 7152.5574      | 29.2969       |
|                |                                                                                     | H31           | +0.06      | 7152.5574      | 29.2969       |
|                |                                                                                     | O21           | -0.8       | 379996.6945    | 564.9754      |
| Heptanoic acid |  | C11           | +0.52      | 3248063.4400   | 1167.9840     |
|                |                                                                                     | C21           | -0.12      | 892114.2141    | 485.3021      |
|                |                                                                                     | C31           | -0.18      | 892114.2141    | 485.3021      |
|                |                                                                                     | H11           | +0.45      | 0.0000         | 0.0000        |
|                |                                                                                     | H21           | +0.06      | 7152.5574      | 29.2969       |
|                |                                                                                     | H31           | +0.06      | 7152.5574      | 29.2969       |
|                |                                                                                     | O11           | -0.53      | 578580.8310    | 627.2439      |
|                |                                                                                     | O12           | -0.44      | 379996.6945    | 564.9754      |

Tabla S2. Combined parameters.

| Atom type 1 | Atom type 2 | A12 (kcal/mol) | B6 (kcal/mol) |
|-------------|-------------|----------------|---------------|
| C_calcite   | C_calcite   | 1101816.44359  | 3417.78203    |
| C_calcite   | Ca_calcite  | 0.00000        | 0.00000       |
| C_calcite   | O_calcite   | 216.06119      | 73.61377      |
| Ca_calcite  | Ca_calcite  | 0.00000        | 0.00000       |
| Ca_calcite  | O_calcite   | 226816.44359   | 0.00000       |
| O_calcite   | O_calcite   | 141969.40727   | 12.45220      |
| C_calcite   | H_water     | 0.00000        | 0.00000       |
| C_calcite   | O_water     | 1412523.90057  | 810.22945     |
| Ca_calcite  | H_water     | 0.00000        | 0.00000       |
| Ca_calcite  | O_water     | 211520.07648   | 478.01147     |
| O_calcite   | H_water     | 1907.26577     | 0.23064       |
| O_calcite   | O_water     | 494741.87380   | 537.76291     |

Table S3. Systems evaluated on the surface affinity of surface (104) of calcite to crude oil models in the SW models at different conditions.

|                           | Crude oil model composition (disperse phase)/Smart water composition (continues phase) | Molecules numbers                                       | Polar compounds concentration (ppm)/Salt concentration (ppm) | pH     |
|---------------------------|----------------------------------------------------------------------------------------|---------------------------------------------------------|--------------------------------------------------------------|--------|
| Non-polar crude oil model | Water/heptane                                                                          | 1453 / 1264                                             | ----/----                                                    |        |
|                           | Heptane/water                                                                          | 156 / 11777                                             | ----/----                                                    |        |
|                           | Heptane/NaCl – water                                                                   | 156 / (11 <sup>+</sup> 11 <sup>-</sup> ) – 11777        | ---- / 3000                                                  |        |
|                           |                                                                                        | 156 / (112 <sup>+</sup> 112 <sup>-</sup> ) – 11777      | ---- / 30000                                                 |        |
|                           | Heptane/CaCl <sub>2</sub> – water                                                      | 156 / (6 <sup>+</sup> 12 <sup>-</sup> ) – 11777         | ---- / 3000                                                  |        |
|                           |                                                                                        | 156 / (59 <sup>+</sup> 118 <sup>-</sup> ) – 11777       | ---- / 30000                                                 | ----   |
|                           | Heptane/CaSO <sub>4</sub> – water                                                      | 156 / (4 <sup>+</sup> 4 <sup>-</sup> ) – 11777          | ---- / 2600                                                  |        |
|                           |                                                                                        | 156 / (42 <sup>+</sup> 42 <sup>-</sup> ) – 11777        | ---- / 26000                                                 |        |
|                           | Heptane/MgSO <sub>4</sub> – water                                                      | 156 / (5 <sup>+</sup> 5 <sup>-</sup> ) – 11777          | ---- / 3000                                                  |        |
|                           |                                                                                        | 156 / (55 <sup>+</sup> 55 <sup>-</sup> ) – 11777        | ---- / 30000                                                 |        |
| Polar crude oil model     | Heptanoate – heptane/Na <sup>+</sup> – water                                           | 30 – 156 / 30 – 11777                                   | 198652 / ----                                                |        |
|                           | Heptanoate – heptane/Ca <sup>2+</sup> – water                                          | 30 – 156 / 15 – 11777                                   | 198652 / ----                                                |        |
|                           | Heptanoate – heptane/Mg <sup>2+</sup> – water                                          | 30 – 156 / 15 – 11777                                   | 198652 / ----                                                |        |
|                           | Heptanoate – heptane/NaCl – water                                                      | 30 – 156 / (11 <sup>+</sup> 11 <sup>-</sup> ) – 11777   | 198652 / 3000                                                |        |
|                           |                                                                                        | 30 – 156 / (112 <sup>+</sup> 112 <sup>-</sup> ) – 11777 | 198652 / 30000                                               |        |
|                           | Heptanoate – heptane/Na <sub>2</sub> SO <sub>4</sub> – water                           | 30 – 156 / (38 <sup>+</sup> 4 <sup>-</sup> ) – 11777    | 198652 / 3000                                                | >> 4.4 |
|                           |                                                                                        | 30 – 156 / (122 <sup>+</sup> 46 <sup>-</sup> ) – 11777  | 198652 / 30000                                               |        |
|                           | Heptanoate – heptane/CaCl <sub>2</sub> – water                                         | 30 – 156 / (6 <sup>+</sup> 12 <sup>-</sup> ) – 11777    | 198652 / 3000                                                |        |
|                           |                                                                                        | 30 – 156 / (59 <sup>+</sup> 118 <sup>-</sup> ) – 11777  | 198652 / 30000                                               |        |
|                           | Heptanoate – heptane/CaSO <sub>4</sub> – water                                         | 30 – 156 / (4 <sup>+</sup> 4 <sup>-</sup> ) – 11777     | 198652 / 2600                                                |        |

|                                                               |                                         |                          |        |
|---------------------------------------------------------------|-----------------------------------------|--------------------------|--------|
|                                                               | $30 - 156 / (42^+ 42^-) - 11777$        | $198652 / 26000$         |        |
| Heptanoate – heptane/MgCl <sub>2</sub> – water                | $30 - 156 / (22^+ 14^-) - 11777$        | $198652 / 3000$          |        |
|                                                               | $30 - 156 / (83^+ 136^-) - 11777$       | $198652 / 30000$         |        |
| Heptanoate – heptane/MgSO <sub>4</sub> – water                | $30 - 156 / (5^+ 5^-) - 11777$          | $198652 / 3000$          |        |
|                                                               | $30 - 156 / (55^+ 55^-) - 11777$        | $198652 / 30000$         |        |
| Heptanoic acid – heptanoate – heptane/Na <sup>+</sup> – water | $15 - 15 - 156 / 15 - 11777$            | $100023 - 99249 / ----$  |        |
| Heptanoic acid – heptanoate – heptane/NaCl – water            | $15 - 15 - 156 / (26^+ 11^-) - 11777$   | $100023 - 99249 / 3000$  | = 4.4  |
|                                                               | $15 - 15 - 156 / (127^+ 112^-) - 11777$ | $100023 - 99249 / 30000$ |        |
| Heptanoic acid – heptane/water                                | $15 - 156 / 11777$                      | $199892 / ----$          |        |
| Heptanoic acid – heptane/NaCl – water                         | $15 - 156 / (11^+ 11^-) - 11777$        | $199892 / 3000$          | << 4.4 |
|                                                               | $15 - 156 / (112^+ 112^-) - 11777$      | $199892 / 30000$         |        |

Note: + and - above the numbers correspond to the number of cations and anions in water, respectively. The concentrations in the crude oil models correspond to polar molecules in heptane. “=” equal to, “<<” much less than, and “>>” much greater than.

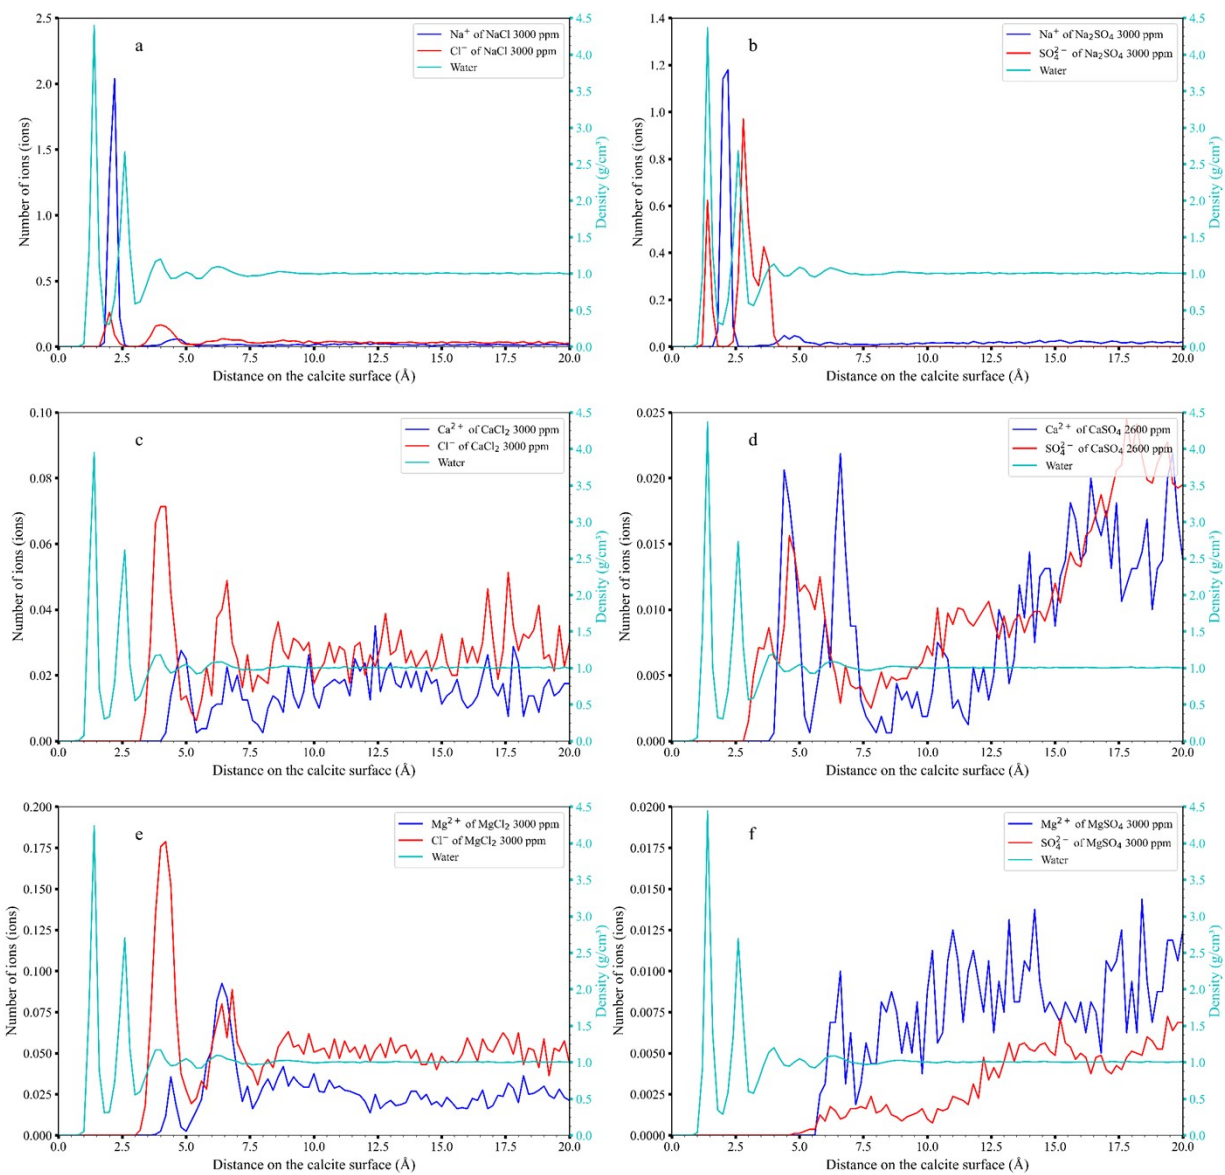

Figure S1. Distribution of cations, distribution of anions, and the one-dimensional mass water density profile of SW models on the calcite surface at LSCC. a) NaCl SW. b) Na<sub>2</sub>SO<sub>4</sub> SW. c) CaCl<sub>2</sub> SW. d) CaSO<sub>4</sub> SW. e) MgCl<sub>2</sub> SW. f) MgSO<sub>4</sub> SW. These profiles were averaged for 8 ns.

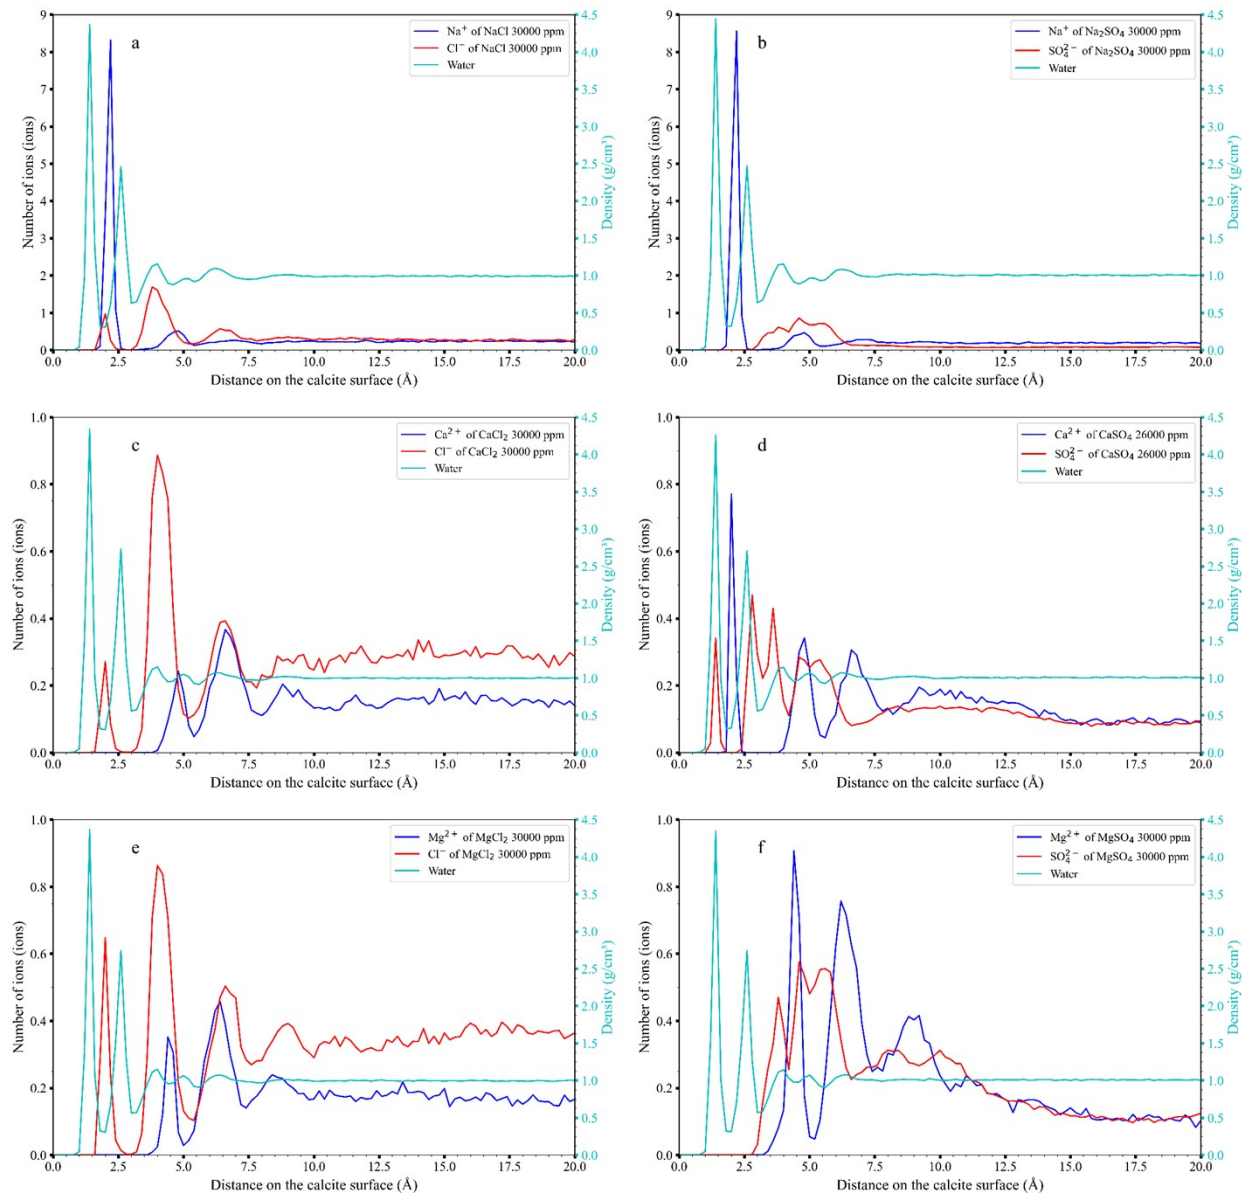

Figure S2. Distribution of cations, distribution of anions, and the one-dimensional mass water density profile of SW models on the calcite surface at HSCC. a) NaCl SW. b)  $\text{Na}_2\text{SO}_4$  SW. c)  $\text{CaCl}_2$  SW. d)  $\text{CaSO}_4$  SW. e)  $\text{MgCl}_2$  SW. f)  $\text{MgSO}_4$  SW. These profiles were averaged for 8 ns.

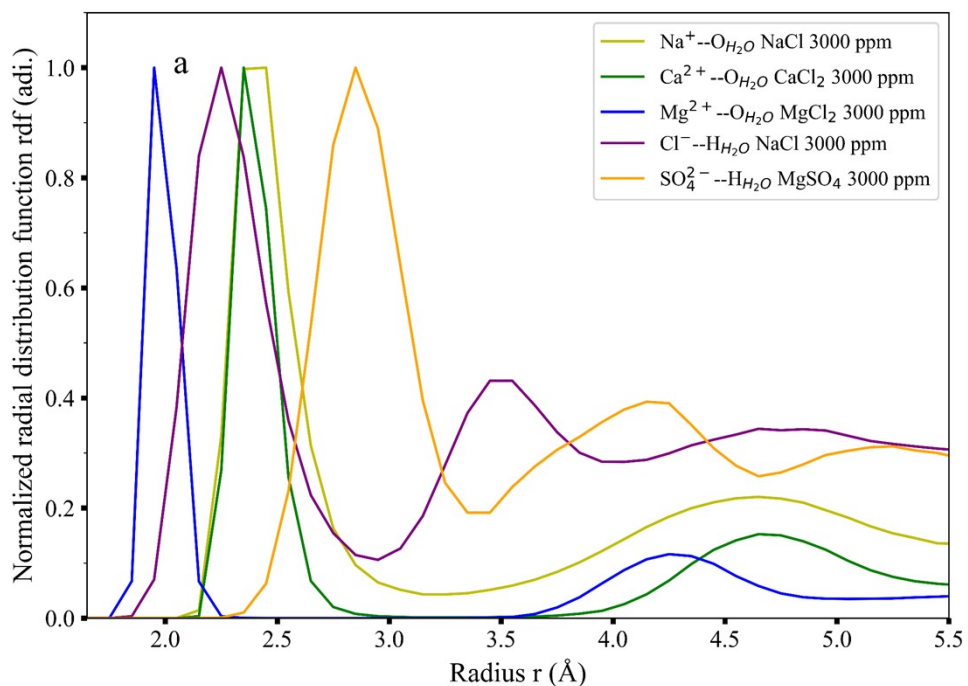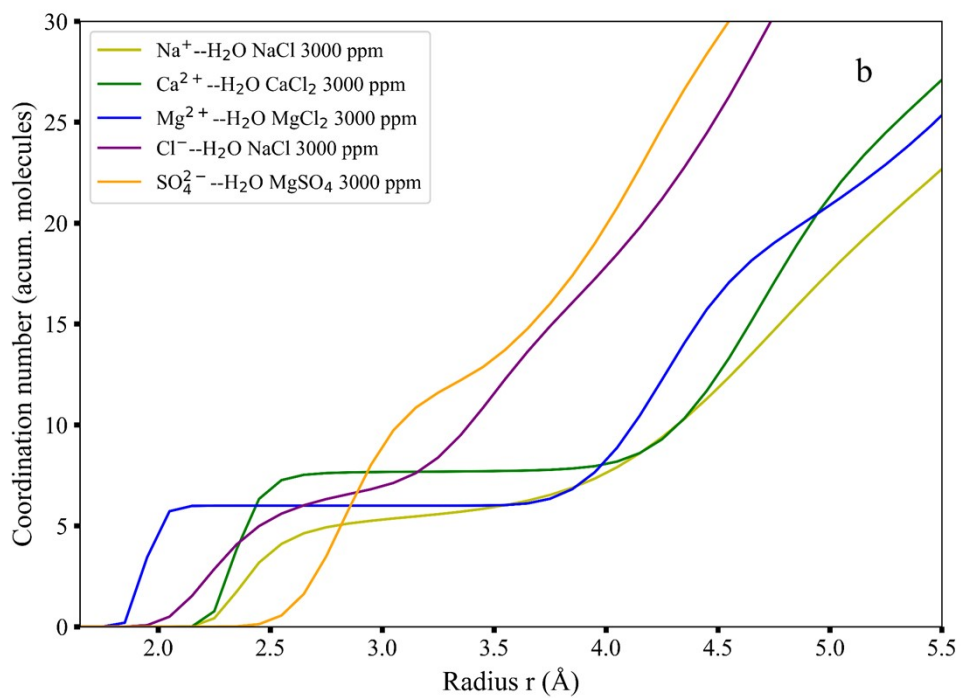

Figure S3. a) Normalized *rdf* of  $Na^+ - O_{H_2O}$ ,  $Ca^{2+} - O_{H_2O}$ ,  $Mg^{2+} - O_{H_2O}$ ,  $SO_4^{2-} - H_{H_2O}$  and  $Cl^- - H_{H_2O}$  at LSCC. b) Coordination number of  $Na^+ - O_{H_2O}$ ,  $Ca^{2+} - O_{H_2O}$ ,  $Mg^{2+} - O_{H_2O}$ ,  $SO_4^{2-} - H_{H_2O}$  and  $Cl^- - H_{H_2O}$  at LSCC. These profiles were averaged for 8 ns.



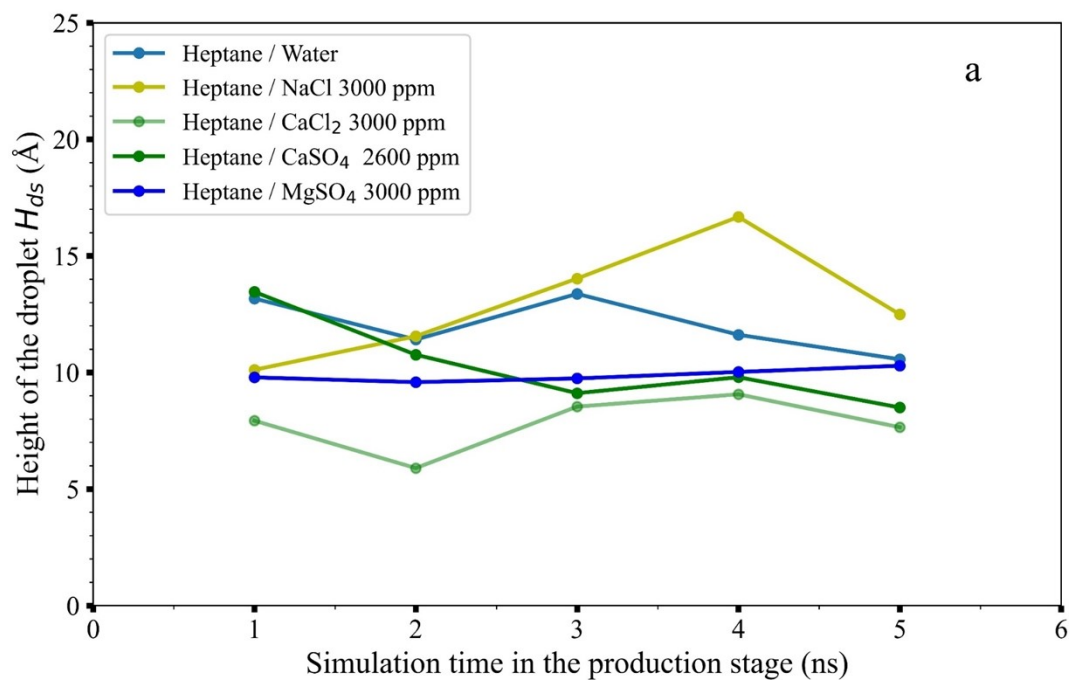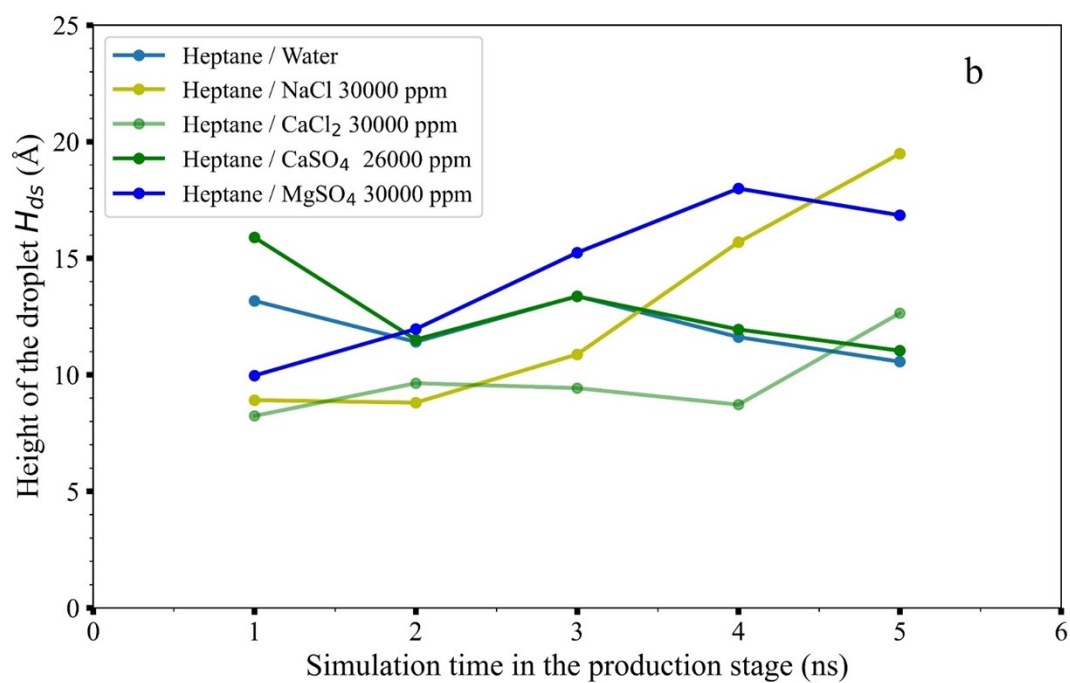

Figure S4. Height of droplet  $H_{ds}$  of non-polar crude oil model (non-polar or heptane) in the SW models at pH = 7 and 298.15 K versus simulation time in the production stage. a) At LSCC. b) At HSCC.

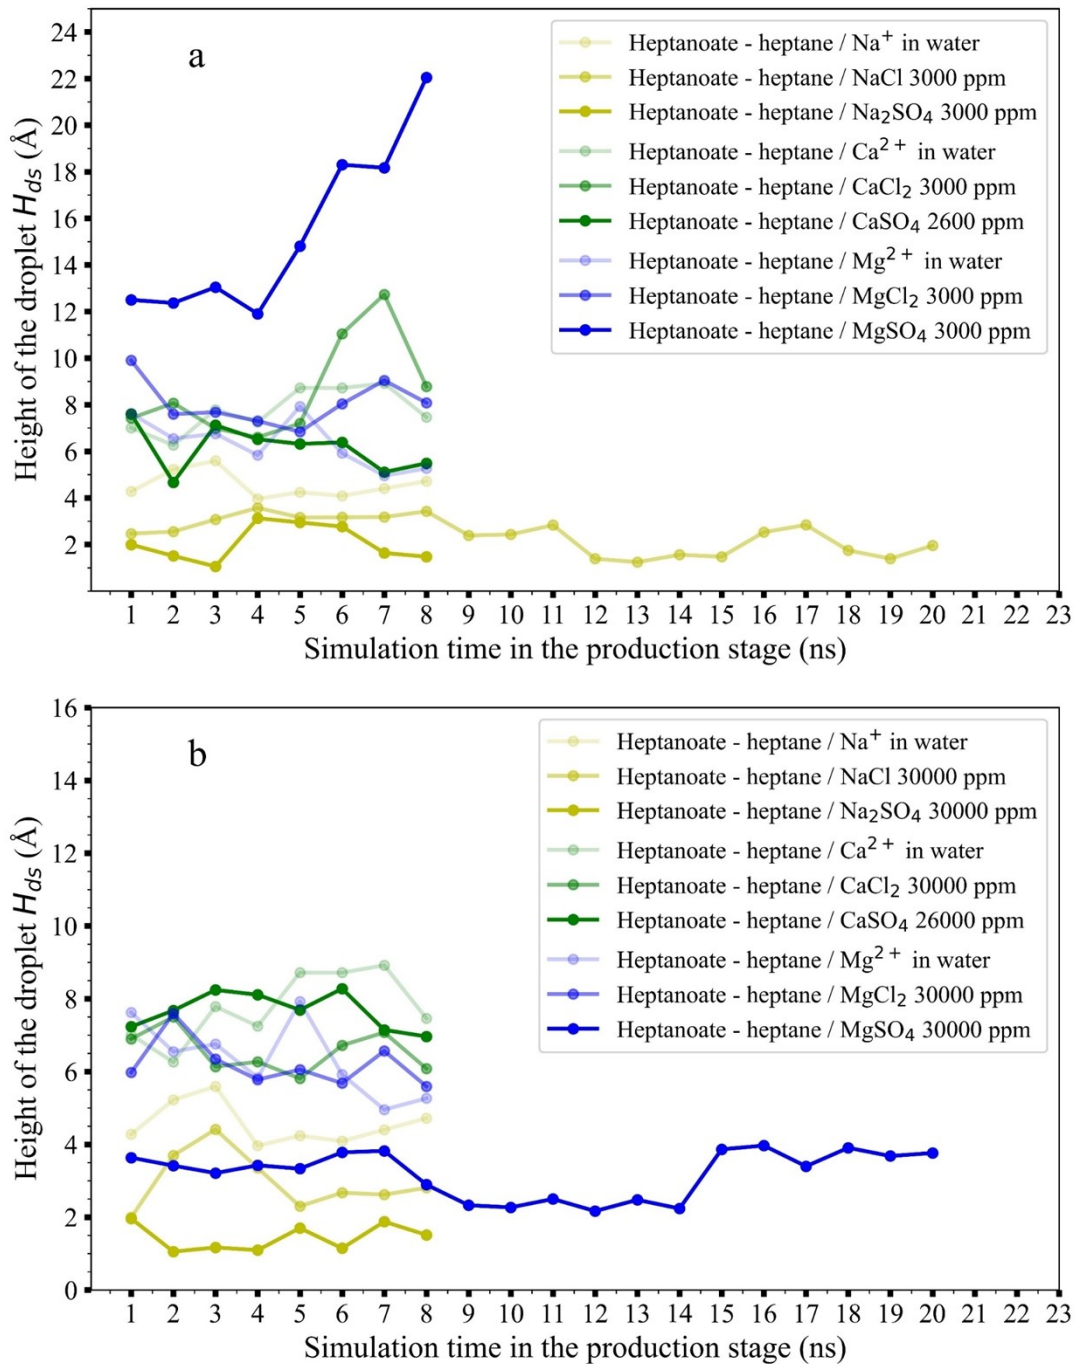

Figure S5. Height of droplet  $H_{ds}$  of polar crude oil model (heptanoate – heptane) in the SW models at  $\text{pH} \gg 4.4$  versus simulations time in the production stage. a) At LSCC. b) At HSCC.

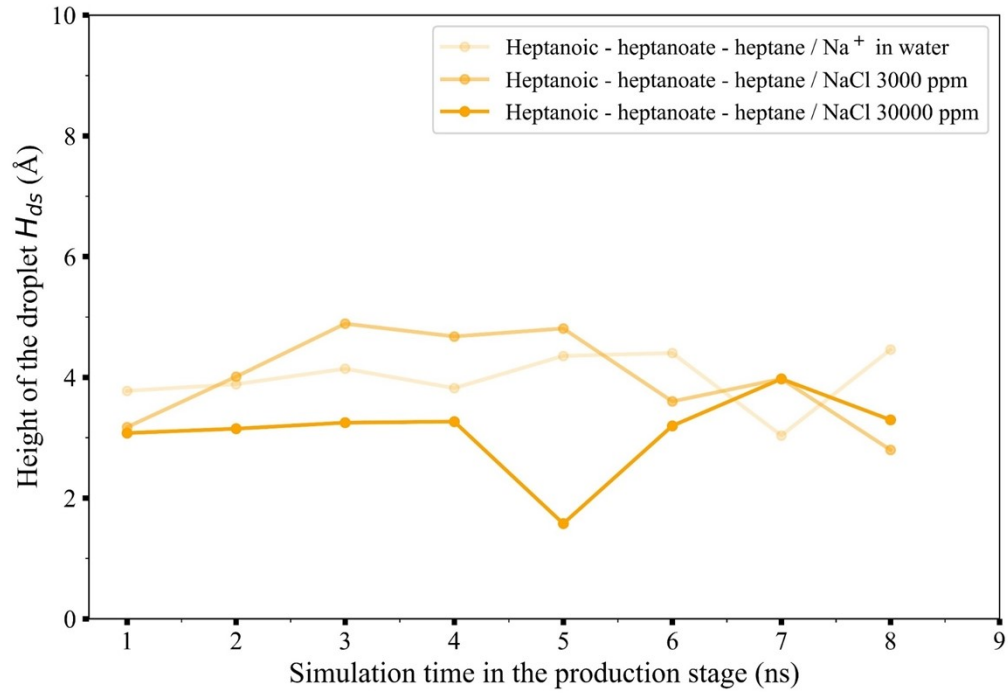

Figure S6. Height of droplet  $H_{ds}$  of polar crude oil model (heptanoic acid – heptanoate – heptane) in the SW models at pH = 4.4 versus simulations time in the production stage.

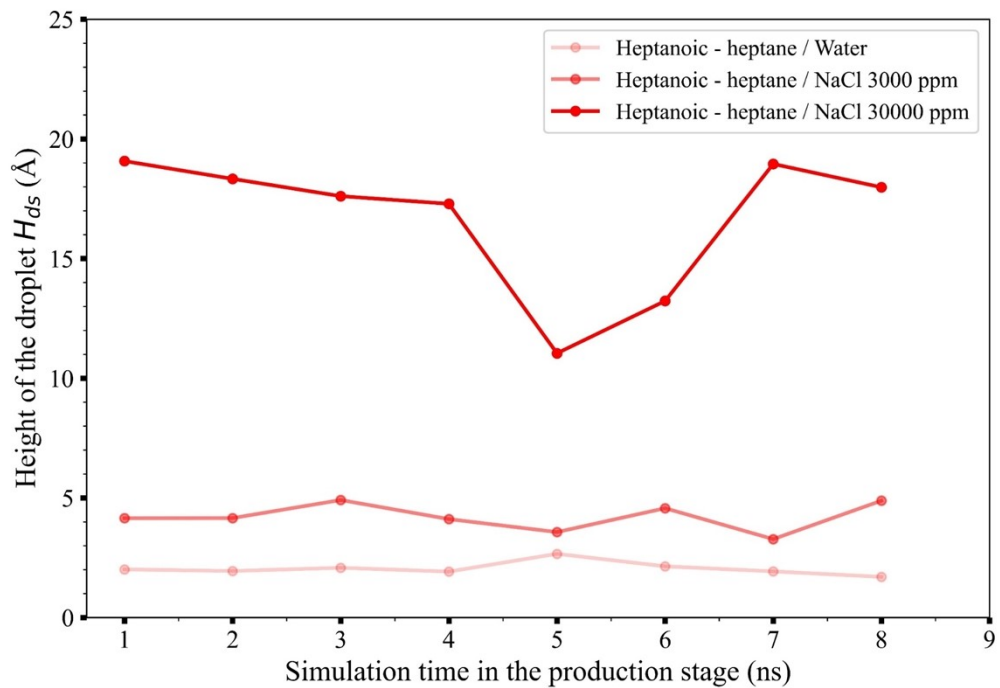

Figure S7. Height of droplet  $H_{ds}$  of polar crude oil model (heptanoic acid – heptane) in the SW models at pH  $\ll$  4.4 versus simulations time in the production stage.

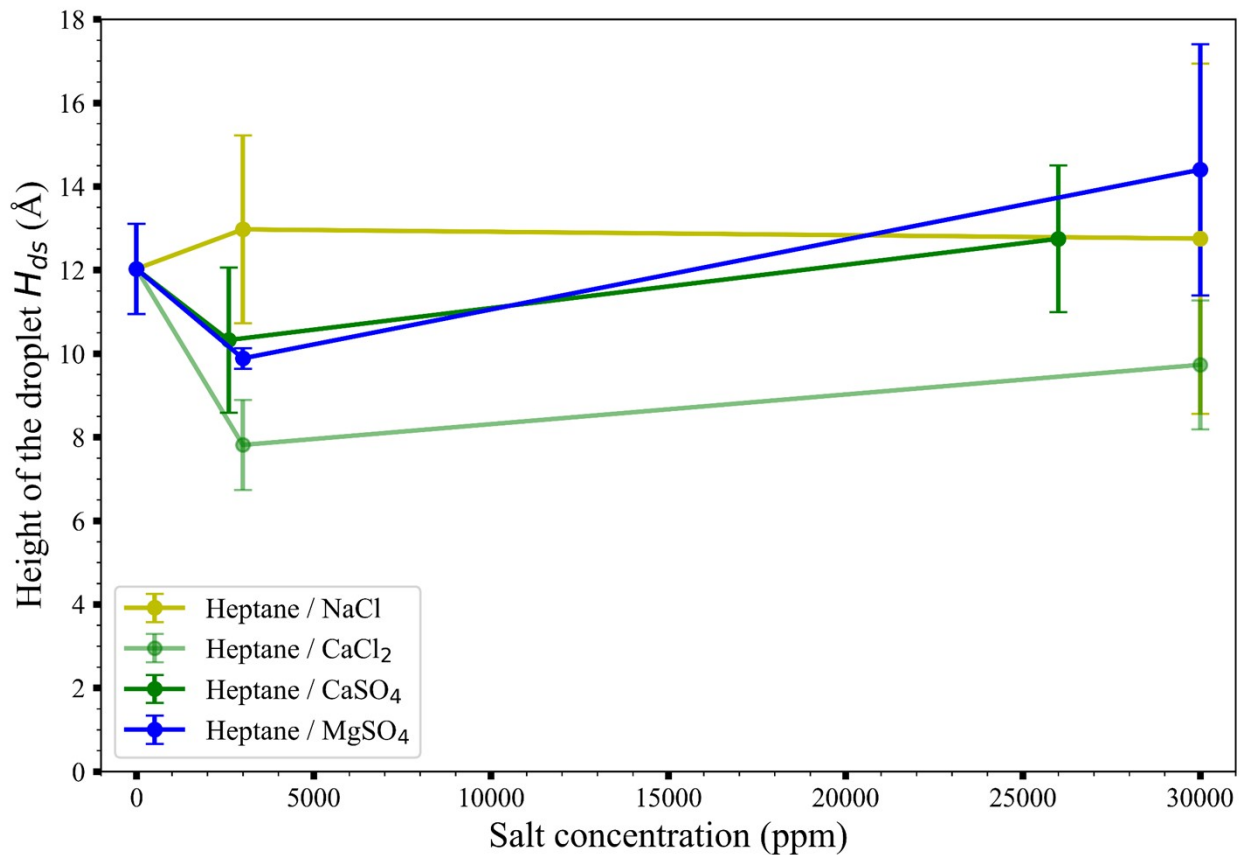

Figure S8. Salinity effect of the SW models on the height of the droplet ( $H_{ds}$ ) of non-polar crude oil model (heptane) on the calcite surface. Each  $H_{ds}$  was calculated for 1 ns and averaged by 5 ns in the production stage.

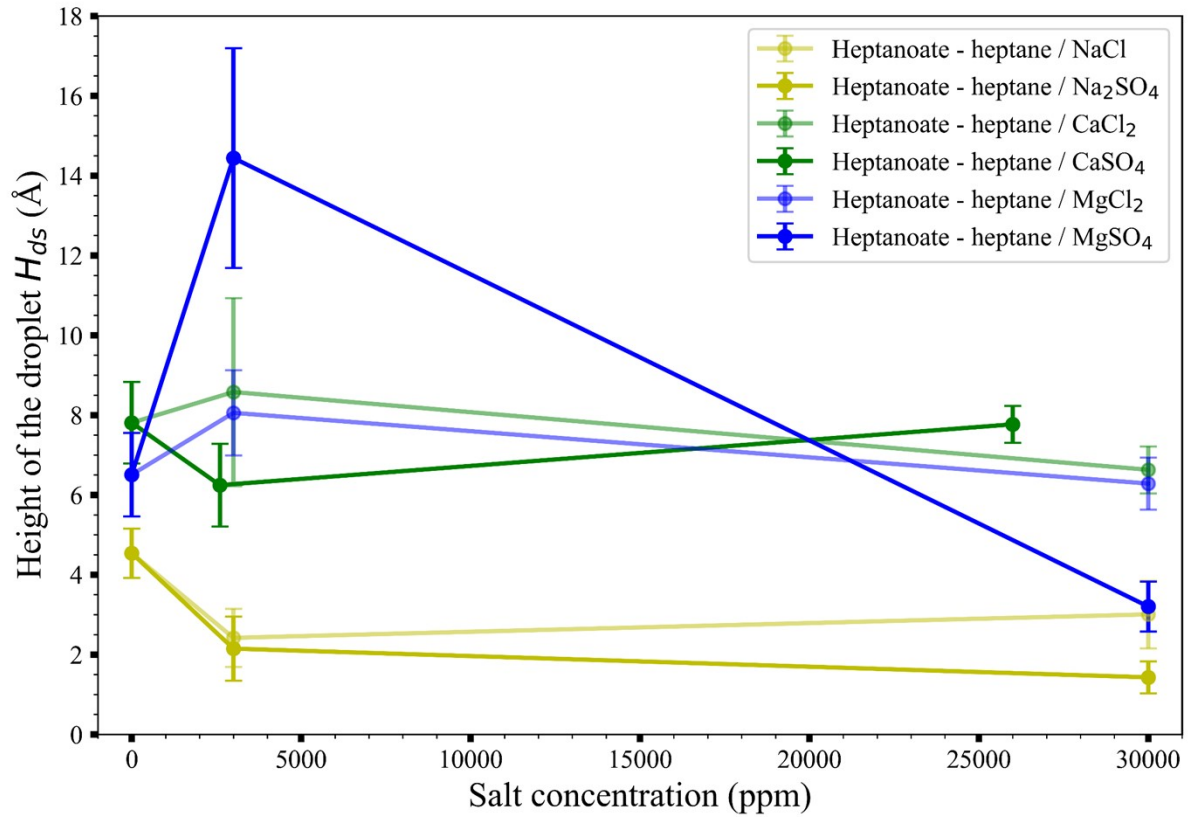

Figure S9. Effect of the SW models salinity at  $\text{pH} \gg 4.4$  on the  $H_{ds}$  of the droplet of polar crude oil model (heptanoate – heptane) on the calcite surface. Each  $H_{ds}$  was calculated for 1 ns and averaged to 8 ns in the production stage.

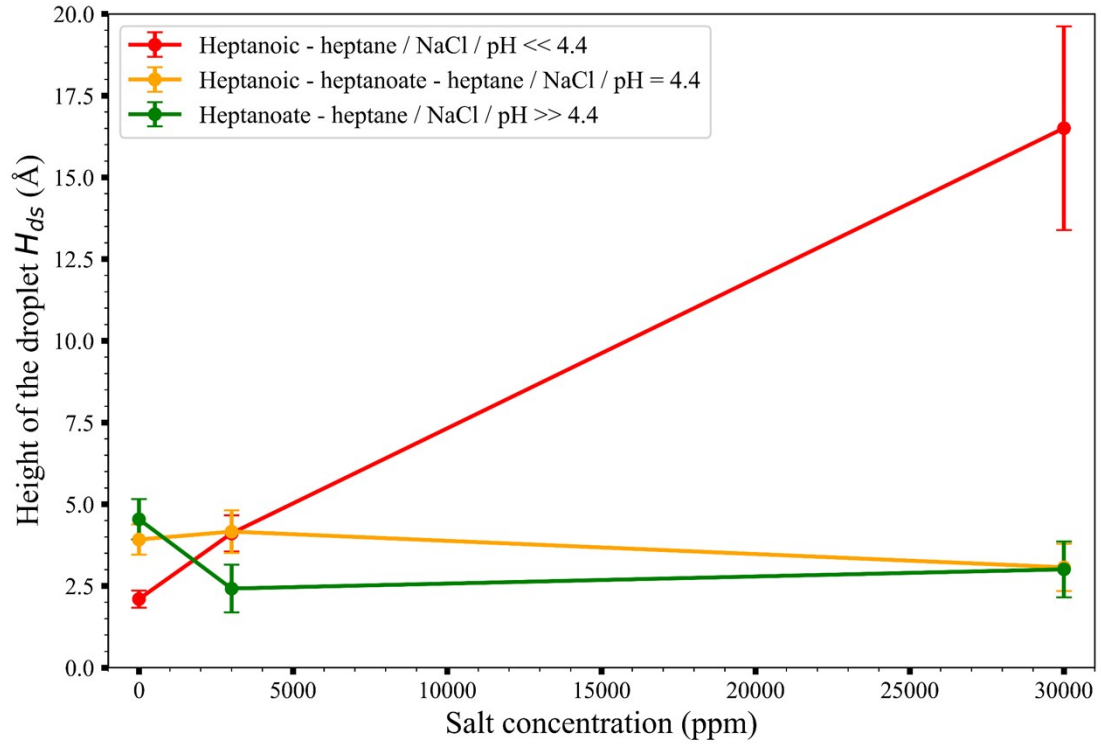

Figure S10. Effect of pH of the NaCl SW model on the height of droplet ( $H_{ds}$ ) of polar crude oil model on the calcite surface. Each  $H_{ds}$  was calculated for 1 ns and averaged to 8 ns in the production stage.

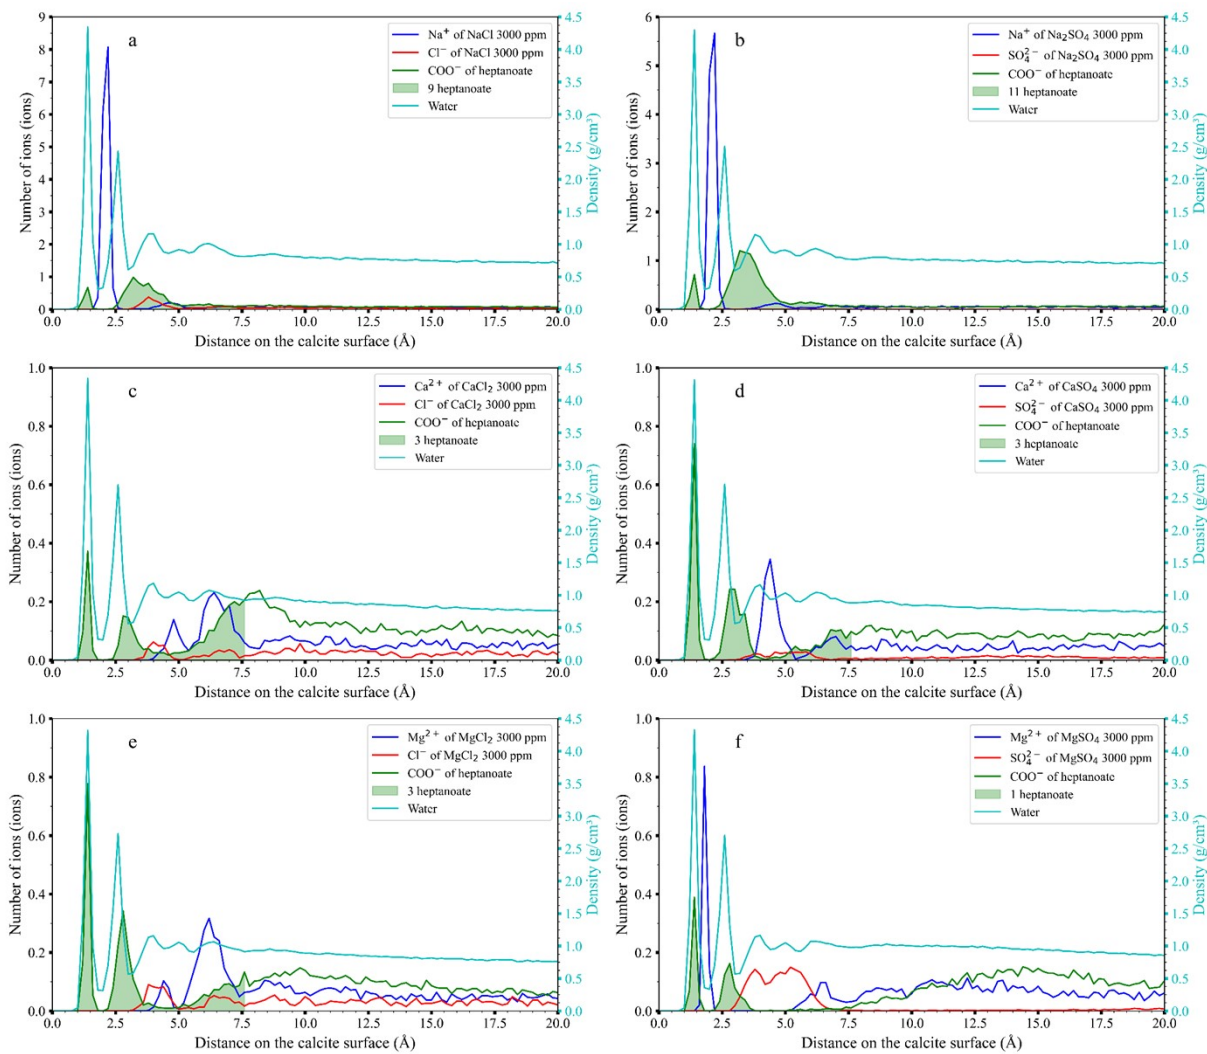

Figure S11. Distribution of cations, distribution of anions, and the one-dimensional mass water density profile of the SW models at  $\text{pH} \gg 4.4$ , distribution of carboxylate groups, and the number of heptanoate between 0 and 7.5 Å (green area) of the polar crude oil model (heptanoate – heptane), on the calcite surface at LSCC. a) NaCl. b)  $\text{Na}_2\text{SO}_4$ . c)  $\text{CaCl}_2$ . d)  $\text{CaSO}_4$ . e)  $\text{MgCl}_2$ . f)  $\text{MgSO}_4$ . These profiles were averaged for 8 ns.

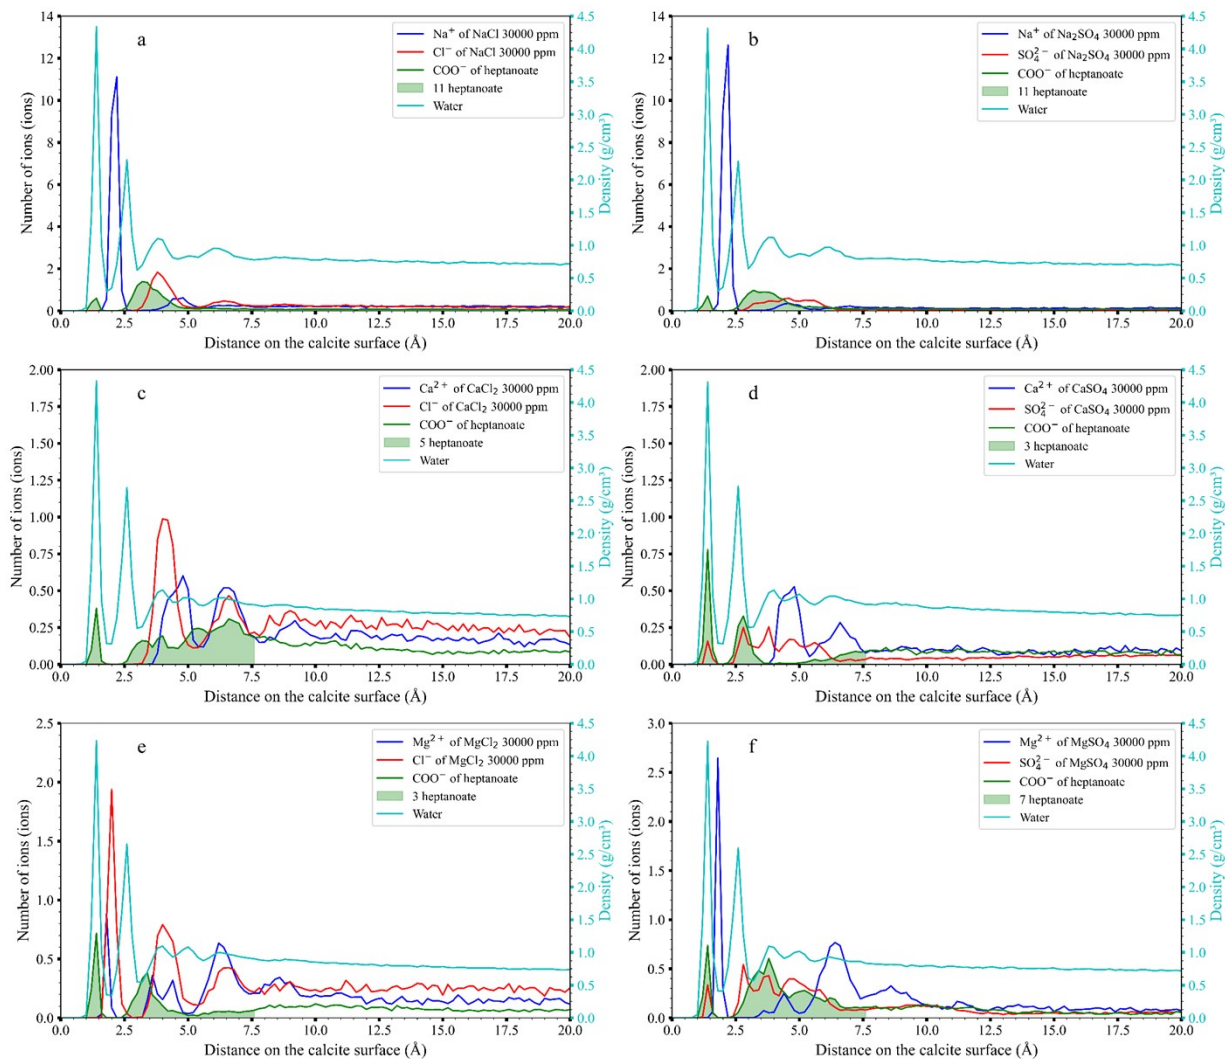

Figure S12. Distribution of cations, distribution of anions, and the one-dimensional mass water density profile of the SW models at pH  $\gg$  4.4, distribution of carboxylate groups, and the number of heptanoate between 0 and 7.5 Å (green area) of the polar crude oil model (heptanoate – heptane), on the calcite surface at HSCC. a) NaCl. b) Na<sub>2</sub>SO<sub>4</sub>. c) CaCl<sub>2</sub>. d) CaSO<sub>4</sub>. e) MgCl<sub>2</sub>. f) MgSO<sub>4</sub>. These profiles were averaged for 8 ns.
